# Supplementary material for: A fear conditioned cue orchestrates a suite of behaviors in rats
Source: eLife journal article supplement (doi:10.7554/elife.82497), 2024-05-20
Supplement: supp [file elife_poa_e82497_Figure_1_figure_supplement_1.pdf › elife_poa_e82497_Figure_1_figure_supplement_1.pdf]

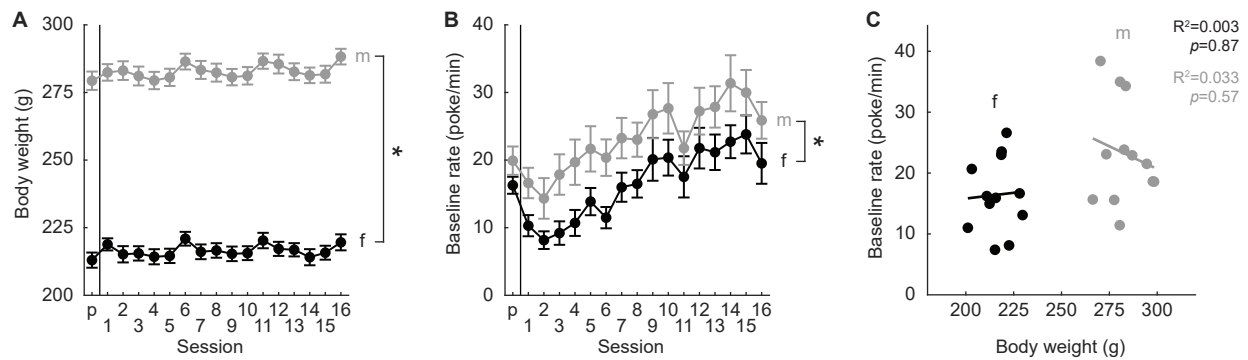

**Figure 1 - Supplemental Figure 1.** Body weight and baseline nose poke rate.

(A) Analysis of variance (ANOVA) for body weight (g) [factors: sex and session] revealed significant main effects of session ( $F(16,352) = 29.58$ ,  $p = 1.90 \times 10^{-55}$ ), sex ( $F(1,22) = 287.54$ ,  $p = 4.07 \times 10^{-14}$ ), and a significant session  $\times$  sex interaction ( $F(16,352) = 2.20$ ,  $p = 0.005$ ). Mean  $\pm$  SEM body weights in grams (y-axis) of males (gray) and females (black) from pre-exposure through session 16. (B) Baseline nose poke rates (poke/min) decreased during discrimination sessions 1 and 2, then increased over the remaining sessions. Males poked at higher baseline levels across all sessions. Analysis of variance (ANOVA) for baseline nose poke rate (poke/min) [factors: sex and session] revealed significant main effects of session ( $F(16,352) = 19.30$ ,  $p = 4.44 \times 10^{-39}$ ) and sex ( $F(1,22) = 5.10$ ,  $p = 0.034$ ). Mean baseline pose rate (y-axis) of males and females from sessions 1-16. (C) Baseline nose poke rate plotted against body weight for all individuals. There was no relationship between the two measures in either female or male rats. \*paired samples t-test  $p < 0.05$ .
