# Supplementary material for: A fear conditioned cue orchestrates a suite of behaviors in rats
Source: eLife journal article supplement (doi:10.7554/elife.82497), 2024-05-20
Supplement: supp [file elife_poa_e82497_Figure_1_figure_supplement_2.pdf › elife_poa_e82497_Figure_1_figure_supplement_2.pdf]

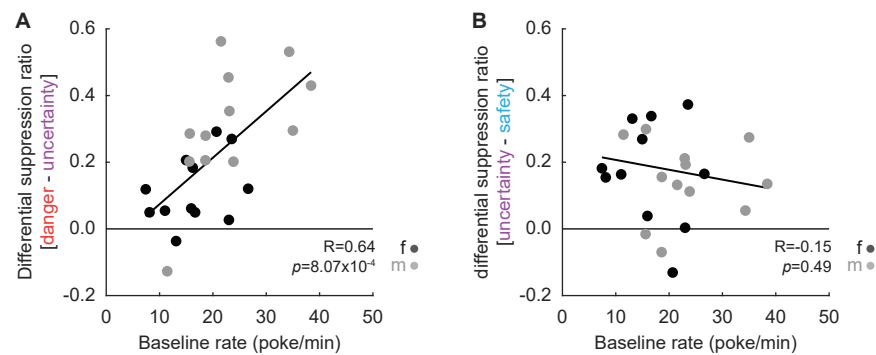

**Figure 1 - Supplemental Figure 2.** Nose poke x discrimination.

Correlations between baseline nose poke rate and differential suppression ratios for **(A)** danger and uncertainty, and **(B)** uncertainty and safety are shown. Individuals represented by black (female) and gray (male) circles.  $R$  and  $p$  values from Pearson's correlation coefficient reported.
