# Supplementary material for: A fear conditioned cue orchestrates a suite of behaviors in rats
Source: eLife journal article supplement (doi:10.7554/elife.82497), 2024-05-20
Supplement: supp [file elife_poa_e82497_Figure_3_figure_supplement_2.pdf › elife_poa_e82497_Figure_3_figure_supplement_2.pdf]

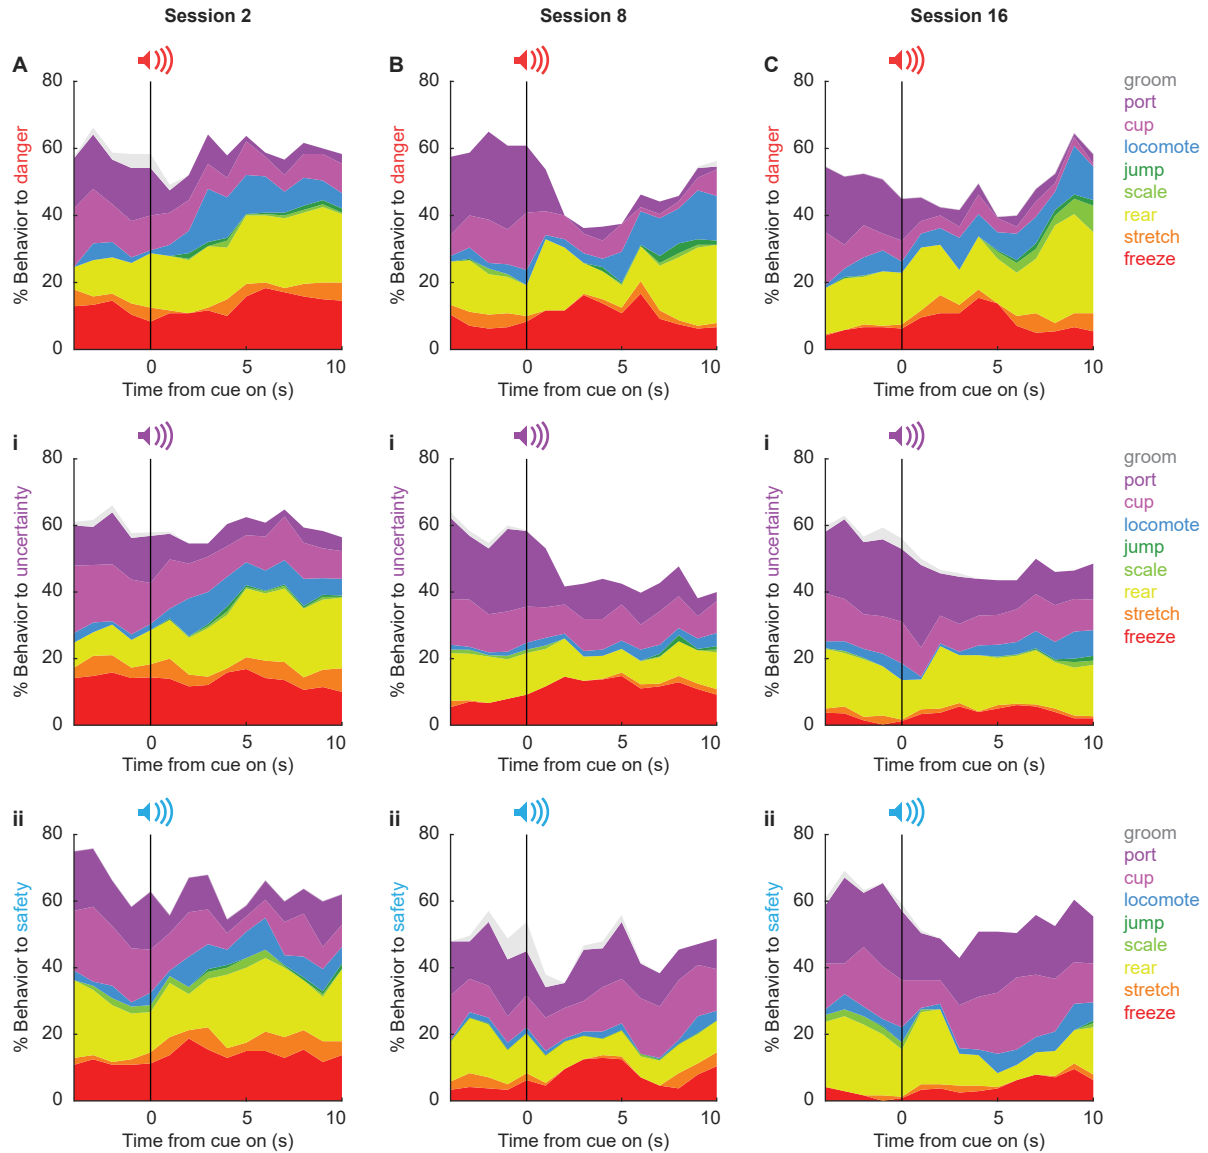

**Figure 3 - Supplemental Figure 2.** Female ethograms.

Mean percent behavior from 5s prior through 10-s cue presentation is shown for danger (row 1), uncertainty (row 2), and safety (row 3) during sessions (A) 2, (B) 8, and (C) 16. Behaviors quantified are groom (gray), port (dark purple), cup (light purple), locomote (blue), jump (dark green), scale (light green), rear (yellow), stretch (orange), and freeze (red).
