# Supplementary material for: A fear conditioned cue orchestrates a suite of behaviors in rats
Source: eLife journal article supplement (doi:10.7554/elife.82497), 2024-05-20
Supplement: supp [file elife_poa_e82497_Figure_3_figure_supplement_3.pdf › elife_poa_e82497_Figure_3_figure_supplement_3.pdf]

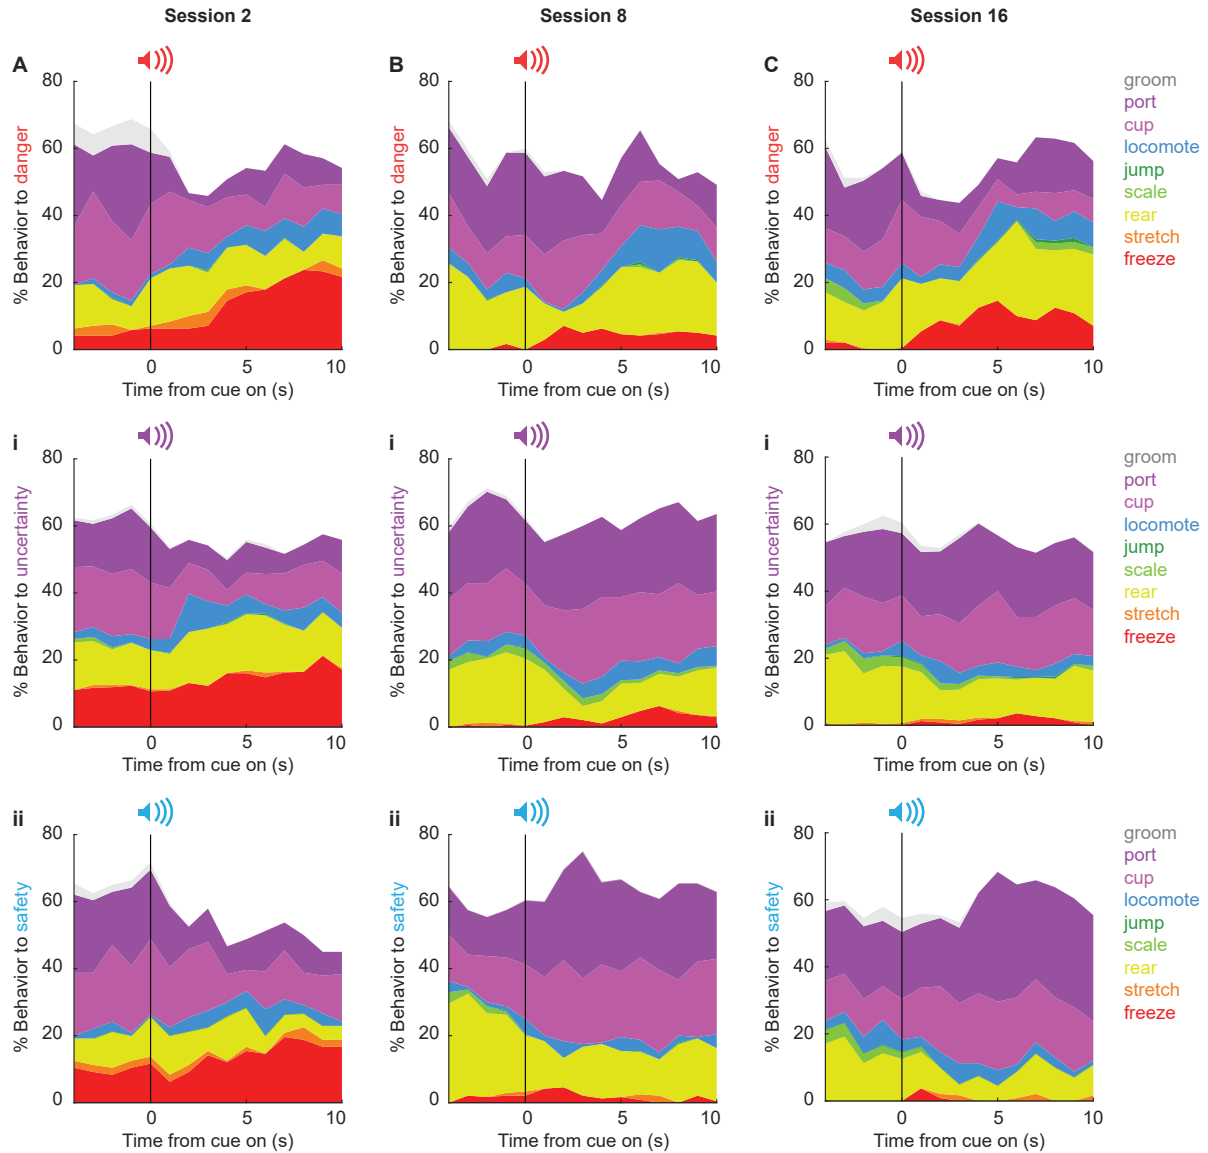

**Figure 3 - Supplemental Figure 3. Male ethograms.**

Mean percent behavior from 5s prior through 10-s cue presentation is shown for danger (row 1), uncertainty (row 2), and safety (row 3) during sessions **(A)** 2, **(B)** 8, and **(C)** 16. Behaviors quantified are groom (gray), port (dark purple), cup (light purple), locomote (blue), jump (dark green), scale (light green), rear (yellow), stretch (orange), and freeze (red).
