# Supplementary material for: A fear conditioned cue orchestrates a suite of behaviors in rats
Source: eLife journal article supplement (doi:10.7554/elife.82497), 2024-05-20
Supplement: supp [file elife_poa_e82497_Figure_4_figure_supplement_1.pdf › elife_poa_e82497_Figure_4_figure_supplement_1.pdf]

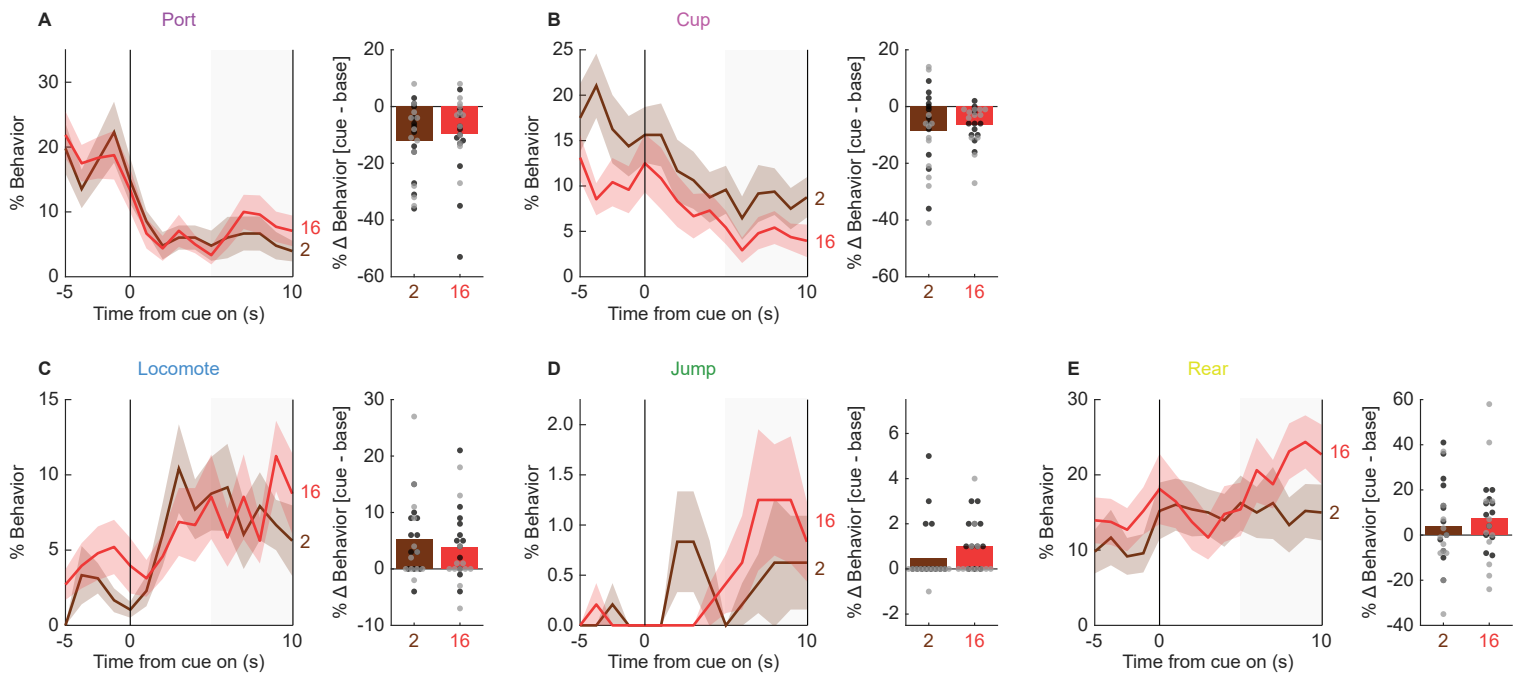

**Figure 4 - Supplemental Figure 1.** Comparisons of danger-specific behaviors during sessions 2 and 16.

Mean  $\pm$  SEM percent behavior from 5s prior through 10-s danger presentation is shown for **(A)** port, **(B)** cup, **(C)** locomote, **(D)** jump, and **(E)** rear, for session 2 (dark brown) and 16 (red). Adjacent plots show mean  $\%$  change in behavior from baseline to last 5 s of danger presentation for all rats during session 2 (dark brown) and 16 (red). Individual data points shown (females, black and males gray).
