# Supplementary material for: A fear conditioned cue orchestrates a suite of behaviors in rats
Source: eLife journal article supplement (doi:10.7554/elife.82497), 2024-05-20
Supplement: supp [file elife_poa_e82497_Figure_4_figure_supplement_2.pdf › elife_poa_e82497_Figure_4_figure_supplement_2.pdf]

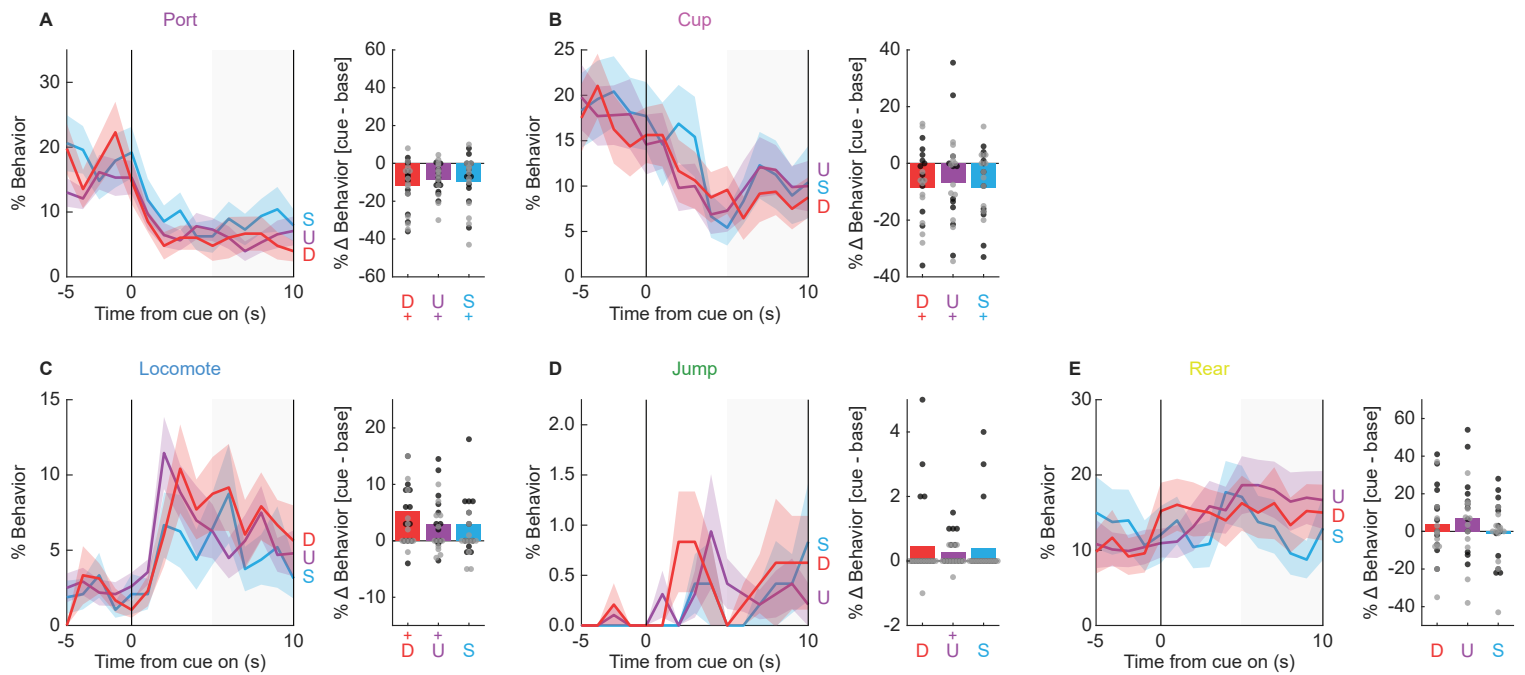

**Figure 4 - Supplemental Figure 2.** Danger-specific behaviors during Session 2.

Mean  $\pm$  SEM percent behavior from 5s prior through 10-s cue presentation is shown for (A) port, (B) cup, (C) locomote, (D) jump, and (E) rear, danger (red), uncertainty (purple), and safety (blue). Adjacent plots show mean % change in behavior from baseline to last 5 s of cue presentation for all rats. Individual data points shown (females, black and males gray).  $\pm$ 95% bootstrap confidence interval does not contain zero.
