# Supplementary material for: A fear conditioned cue orchestrates a suite of behaviors in rats
Source: eLife journal article supplement (doi:10.7554/elife.82497), 2024-05-20
Supplement: supp [file elife_poa_e82497_Figure_5_figure_supplement_1.pdf › elife_poa_e82497_Figure_5_figure_supplement_1.pdf]

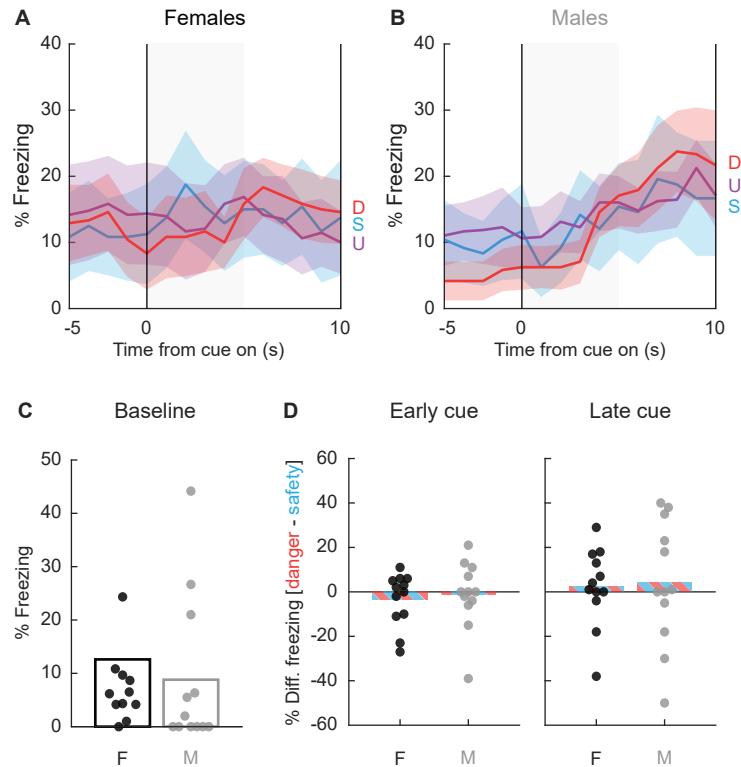

**Figure 5 - Supplemental Figure 1. Session 2 freezing.**

Mean  $\pm$  SEM percent freezing from 5s prior through 10-s cue presentation is shown for danger (red), uncertainty (purple), and safety (blue) for **(A)** females, and **(B)** males. ANOVA [factors: sex, cue, and interval] found no significant main effect or interaction for cue ( $F_s < 1.4$ ,  $p_s > 0.1$ ). Instead, ANOVA only revealed a significant main effect of interval and a significant sex  $\times$  interval interaction ( $F_s > 2.5$ ,  $p_s < 0.01$ ). Rats increased freezing to all cues over presentation and this increase was greatest in males. **(C)** Baseline freezing was equivalent in females and males and neither sex showed differential freezing to danger and safety during either early or late cue periods. Mean % differential freezing to danger and safety plotted **(D)**. Individual data points shown (females, black and males gray).
