# Supplementary material for: A fear conditioned cue orchestrates a suite of behaviors in rats
Source: eLife journal article supplement (doi:10.7554/elife.82497), 2024-05-20
Supplement: supp [file elife_poa_e82497_Figure_8_figure_supplement_1.pdf › elife_poa_e82497_Figure_8_figure_supplement_1.pdf]

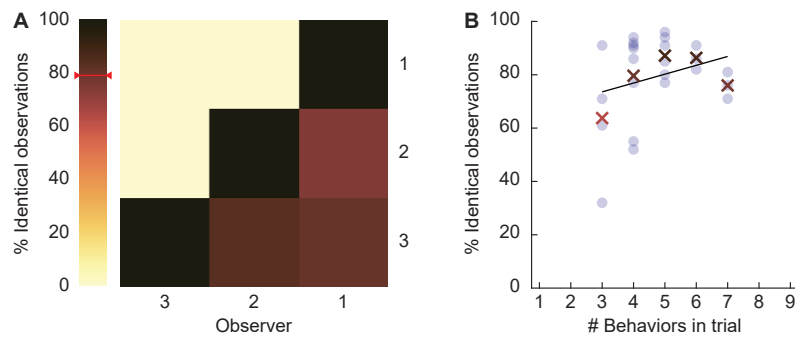

**Figure 8 - Supplemental Figure 1.** Inter-rater reliability.

(A) Percentage of identical observations between observer-observer pairs. (B) Percentage of identical observations as a function of the number of behaviors present in a trial.

Frames were systematically hand-scored by three observers blind to rat identity, session number, and trial type (see Materials and Methods for hand scoring approach and trial anonymization). A comparison data set consisting of 8 trials (800 frames) was also scored by each observer. A correlation matrix compared % identical observations for the 800 comparison frames for each observer-observer pair. Mean % identical observation was 79.25%.
