# Supplementary material for: A fear conditioned cue orchestrates a suite of behaviors in rats
Source: eLife journal article supplement (doi:10.7554/elife.82497), 2024-05-20
Supplement: supp [file elife_poa_e82497_Figure_9_figure_supplement_2.pdf › elife_poa_e82497_Figure_9_figure_supplement_2.pdf]

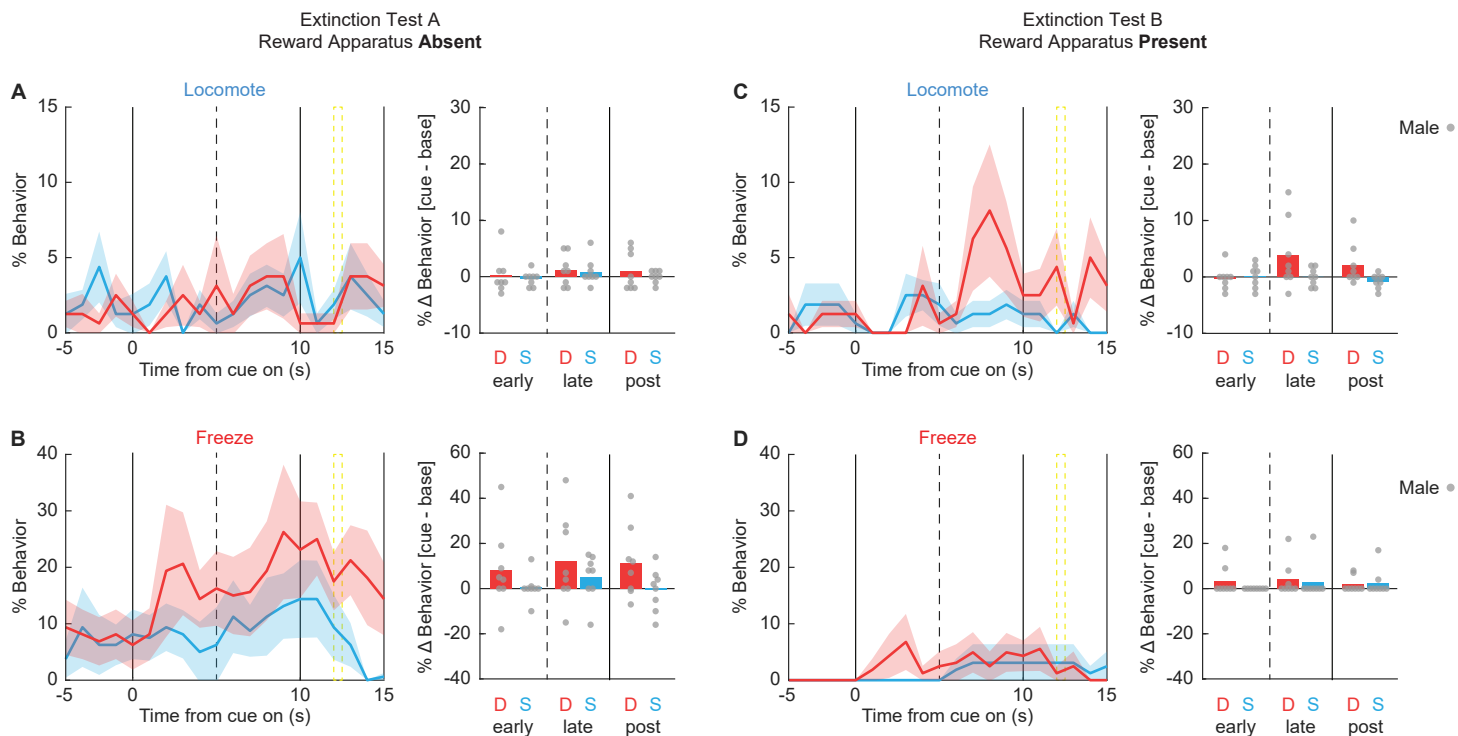

**Figure 9 Supplemental Figure 2. Male behavior during extinction testing.**

Line graphs show mean  $\pm$  SEM percent behavior from 5s prior through 10-s cue presentation for danger (red), and safety (blue) for locomotion during the **(A)** reward apparatus absent extinction test, and **(B)** reward apparatus present extinction test. Bar plots show mean change in behavior from baseline (5 s prior to cue) compared to early (first 5 s), late (last 5 s) and post (5 s after offset) cue periods. Individual males represented by gray dots. The same is shown for freezing **(C&D)**.
