# Supplementary material for: A fear conditioned cue orchestrates a suite of behaviors in rats
Source: eLife journal article supplement (doi:10.7554/elife.82497), 2024-05-20
Supplement: supp [file elife_poa_e82497_Figure_9_figure_supplement_3.pdf › elife_poa_e82497_Figure_9_figure_supplement_3.pdf]

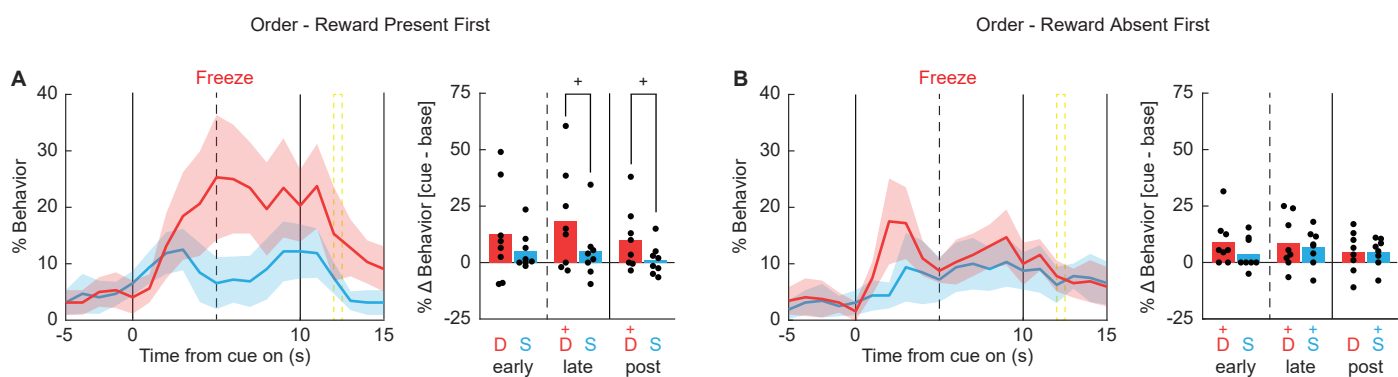

**Figure 9 Supplemental Figure 3.** Freezing separated by test order.

Line graphs show mean  $\pm$  SEM percent freezing from 5s prior through 10-s cue presentation for danger (red), and safety (blue) for rats receiving the reward apparatus present extinction test (A) first and (B) second. Mean responding is taken from both test types. Bar plots show mean change in behavior from baseline (5 s prior to cue) compared to early (first 5 s), late (last 5 s) and post (5 s after offset) cue periods. Individuals represented by black dots. +95% bootstrap confidence interval for danger vs. safety (black), danger vs. baseline (red), or safety vs. baseline (blue) comparison does not contain zero (black). Female and male data are collapsed as sex did not influence the significant interaction of order.
