# Supplementary material for: A fear conditioned cue orchestrates a suite of behaviors in rats
Source: eLife. 2024 May 21;13:e82497. doi: 10.7554/eLife.82497 (PMC11219038; doi:10.7554/eLife.82497)
Supplement: Supplementary file 1. — Significant main effects and interactions are bolded. [file elife-82497-supp1.xlsx]

## Sheet: Sheet1
	Suppression ratio
Cue	F(2,44) = 58.44	p = 4.10 x 10-13
Cue x sex	F(2,44) = 3.62	p = 0.035
Session	F(16,352) = 12.12	p = 2.63 x 10-25
Session x sex	F(16,352) = 5.26	p = 6.05 x 10-10
Cue x session	F(32,704) = 6.58	p = 5.51 x 10-24
Cue x session x sex	F(32,704) = 1.68	p = 0.012
Sex	F(1,22) = 59.08	p = 1.14 x 10-7
