# Supplementary material for: A fear conditioned cue orchestrates a suite of behaviors in rats
Source: eLife. 2024 May 21;13:e82497. doi: 10.7554/eLife.82497 (PMC11219038; doi:10.7554/eLife.82497)
Supplement: Supplementary file 3. — Significant main effects and interactions are bolded. [file elife-82497-supp3.xlsx]

## Sheet: Sheet1
	Suppression ratio
Cue	F(1,14) = 75.98	p = 4.98 x 10-7
Cue x sex	F(1,14) = 0.26	p = 0.62
Session	F(12,168) = 20.79	p = 2.04 x 10-27
Session x sex	F(12,168) = 1.54	p = 0.12
Cue x session	F(12,168) = 8.54	p = 1.50 x 10-12
Cue x session x sex	F(12,168) = 1.22	p = 0.28
Sex	F(1,14) = 4.48	p = 0.053
